1 **Variability of soybean response to rhizobia inoculant, Vermicompost, and**  
2 **a legume-specific fertilizer blend in Siaya County of Kenya**

3 Catherine Mathenge<sup>1, 2</sup>, Moses Thuita<sup>2\*</sup>, Cargele Masso<sup>2</sup>, Joseph Gweyi-Onyango<sup>1</sup> and Bernard  
4 Vanlauwe<sup>2</sup>

5 <sup>1</sup> Department of Agricultural Science and Technology, Kenyatta University, PO BOX 43844-  
6 00100, Nairobi, Kenya

7 <sup>2</sup> International Institute of Tropical Agriculture, c/o ICIPE, Duduville, Kasarani, PO Box 30772-  
8 00100, Nairobi, Kenya

9 \* Corresponding author: [m.thuita@cgiar.org](mailto:m.thuita@cgiar.org)

## 11 **Abstract**

12 Rhizobia inoculation can increase soybean yield, but its performance is influenced by soybean  
13 genotype, rhizobia strains, environment, and crop management among others. The objective of  
14 the study was to assess soybean response to rhizobia inoculation when grown in soils amended  
15 with urea or Vermicompost to improve nitrogen levels. Two greenhouse experiments and one  
16 field trial at two sites were carried out. The first greenhouse experiment included soils from sixty  
17 locations, sampled from smallholder farms in Western Kenya. The second greenhouse  
18 experiment consisted of one soil selected from soils used in the first experiment where  
19 inoculation response was poor. The soil was amended with Vermicompost or urea. In the two  
20 greenhouse experiments, Legumefix® (inoculant) + Sympal (legume fertilizer blend) were used  
21 as a standard package. Results from the second greenhouse experiment were then validated in the  
22 field. In the first greenhouse trial, soybean response to inoculation was significantly affected by  
23 soil fertility based on nodule fresh weight and shoot biomass. Soils with low nitrogen had low to  
24 no response to inoculation. After amendment, nodule fresh weight, nodule effectiveness, nodule  
25 occupancy, and shoot dry biomass were greater in the treatment amended with Vermicompost  
26 than those amended with urea (Legumefix® + Sympal + Vermicompost and Legumefix® +  
27 Sympal + urea). Under field conditions, trends were similar to the second experiment for  
28 nodulation, nodule occupancy, and nitrogen uptake resulting in significantly greater grain yields  
29 (475, 709, 856, 880, 966 kg ha<sup>-1</sup>) after application of Vermicompost at 0, 37, 74, 111, and 148 kg  
30 N ha<sup>-1</sup>, respectively. It was concluded that soybean nodulation and biological nitrogen fixation in  
31 low fertility soils would not be suppressed by organic amendments like Vermicompost up to 148  
32 kg N ha<sup>-1</sup>.

33 **Keywords:** *Rhizobia inoculation, nodule occupancy, nodule effectiveness, Vermicompost, grain*  
34 *yield.*

## 36 **Introduction**

37 Soybean (*Glycine max* L. Merr) is one of the world's most important legumes in terms of  
38 production and trade and has been a dominant oilseed since the 1960s [1]. The crop is well  
39 known for its high protein content (about 40%) [2]. Additionally, it can improve soil properties  
40 and soil biological health by soil nitrogen enrichment through N<sub>2</sub> fixation and subsequent  
41 mineralization of shoot and root biomass [3]. It therefore represents a significant opportunity in  
42 sub-Saharan Africa (SSA), where over 80% of the soils are nitrogen deficient [85], and over 39%  
43 of the children under 5 years are stunted because of malnutrition caused by nutrient deficiency,  
44 particularly proteins [4], contributing to over one third of child deaths [5]. Integration of soybean  
45 in smallholder farming systems would thus not only improve human nutrition when the crop is  
46 included in diets but also soil productivity. Such benefits would materialize when good  
47 agronomic practices, including integrated soil fertility management, are implemented in soybean  
48 production systems.

49 Crop production, including soybean, faces several constraints which include abiotic and  
50 socioeconomic factors accounting for production discrepancies across regions in SSA.  
51 Consequently, grain yields remain low compared to other regions in the world [6]. Integrated soil  
52 fertility management (ISFM), has been proposed as a viable way towards the sustainable  
53 intensification of smallholder agriculture [7]. The high cost of inputs for nutrient replenishment  
54 or soil amendment has however limited their adoption by resource-constrained smallholder  
55 farmers [8]. Utilization of soybean varieties with high biological nitrogen fixation (BNF)  
56 potential and application of rhizobia inoculants would represent a cost-effective option to reduce  
57 mineral N application [9-14]. Studies on N<sub>2</sub> fixation in soybean using different methodologies

58 revealed that soybean shows a strong demand for nitrogen, up to 80 kg N per 1000 kg of soybean  
59 grain for optimal development and grain productivity [15, 16]. Soybean can fix N from the  
60 atmosphere ranging from 0 to 450 kg N ha<sup>-1</sup> [17, 18]. Under environments conducive for N  
61 fixation, over 60 to 70% of the N requirement of the soybean can be derived from BNF [19],  
62 while the balance could be derived from the soil N stock. Conversely, it has been reported that  
63 BNF could be as low as 5 kg N ha<sup>-1</sup> in depleted soils, which are quite common in the smallholder  
64 farming systems in SSA, which would imply reliance on nitrogen fertilizers even for legume  
65 crops [20].

66 Low soil fertility in SSA is often characterized by low available phosphorous (P), nitrogen (N),  
67 organic matter (C<sub>org</sub>), and soil acidity, among others [21]. Such parameters must be corrected as  
68 they are an integral part of the interaction of legume genotype, rhizobia strain, environment, and  
69 crop management, which determines the performance of BNF in particular and legume  
70 productivity in general [22-25]. Soil organic carbon is a key driver of soil fertility that could  
71 even impede the performance of non-limiting factors, when it is below a certain level in a  
72 specific soil type [26]. Response to inorganic fertilizers could be enhanced by the addition of  
73 organic matter [27]. However most agricultural soils in SSA contain low levels of organic carbon  
74 due to competing use of organic residues [28, 29]. Initiatives that promote rhizobia inoculation in  
75 legume production in Africa generally recommend the application of nutrients such as P, and  
76 lately, more balanced blends have been developed for use with inoculums but do not include N  
77 [14, 23, 30, 31]. This is due to the general assumption that rhizobia would supply the N required  
78 by the legume and applying mineral N would inhibit nodulation. While such inhibition has been  
79 well-documented [32], this could be different in low fertility soils that are N deficient [33].

80 Starter N is sometimes needed to achieve a substantial yield of legumes including soybean when  
81 the symbiotic N<sub>2</sub> fixation is unable to provide enough nitrogen [34].

82 The objective of the study was thus to assess whether soils with a low inoculation response could  
83 be improved by amendment. It was hypothesized that an organic amendment would perform  
84 better than a mineral N fertilizer, given the expected high correlation between organic carbon  
85 and total nitrogen in agricultural soils [35].

## 86 **Materials and methods**

### 87 **Characterization of the study soils**

88 Two greenhouse experiments were established at the International Centre of Insect Physiology  
89 and Ecology (*icipe*), Duduville campus, Nairobi, Kenya. Soils were collected from sixty farms of  
90 Siaya County where low soybean response to inoculation was observed [25, 84] (Fig 1) (where a  
91 varied response to an ISFM soybean package had been observed) at a depth of 0–20 cm, air  
92 dried, and thoroughly mixed to pass through a 2-mm sieve. Subsamples were analyzed for  
93 physical, chemical, and microbiological properties prior to planting. The soils parameters  
94 analyzed were organic Carbon determined by chromic acid digestion and spectrophotometric  
95 analysis [37], total N (%) determined from a wet acid digest [38], and N analyzed by  
96 colorimetric analysis [39]. Soil texture was determined using the hydrometer method; soil pH in  
97 water determined in a 1:2.5 (w/v) soil: water suspension; available P using the Mehlich-3  
98 procedure [40] and the resulting extracts analyzed using the molybdate blue procedure [41]; and  
99 exchangeable cations (Ca, Mg, and K) extracted using the Mehlich-3 procedure and determined  
100 by atomic absorption spectrophotometry. Estimation of rhizobia in the soils was done using the

101 most probable number count [42]; soybean variety TGx1740-2F was used as a trap crop grown  
102 in N free and autoclaved sterile sand.

### 103 **Greenhouse experiments**

104 The first greenhouse experiment was laid as a Completely Randomized Design (CRD) including:  
105 (i) 60 soils collected from the sites indicated in Fig 1, with N and C<sub>org</sub> ranges of 0.029–0.21%  
106 and 0.53–2.1%, respectively, (ii) two treatments, i.e., with and without inoculation (Legumefix®  
107 + Sympal) replicated 3 times for a total number of 360 experimental units. Co-application of  
108 Legumefix® and Sympal, as an inoculation package, was informed by previous findings [23,  
109 36]. Sympal is a legume-specific fertilizer blend (N: P<sub>2</sub>O<sub>5</sub>: K<sub>2</sub>O 0: 23:15 + 10CaO + 4S + 1MgO  
110 + 0.1Zn) and was applied at a rate equivalent to 30 kg P ha<sup>-1</sup> and thoroughly mixed with the soil  
111 for the inoculated treatments (i.e., ≈300 kg Sympal ha<sup>-1</sup>). Soybean variety (TGx1740-2F) was  
112 selected due to its better nodulation with a range of rhizobia than local varieties in different parts  
113 of Kenya [43]. Seeds were surface-sterilized by soaking in 3.5% NaClO solution for 2 min and  
114 rinsed thoroughly 5 times with sterile distilled water. Soils were weighed to fill perforated 2.5-kg  
115 pots. Legumefix® for soybean (containing *Bradyrhizobium japonicum* strain 532c) from  
116 Legume technology Inc (UK) was used at a rate of 10 g per kg soybean seeds for the inoculated  
117 treatments. Three healthy seeds of uniform size were then planted per pot and thinned to one  
118 plant per pot of comparable height and vigor at 2 weeks after planting. Routine management  
119 practices such as watering were carried out till termination of the experiment, i.e., at 50%  
120 podding. This trial was thus intended to determine soybean response to co-application of  
121 inoculation and Sympal in various soils characterized by a gradient of nitrogen content.

122 In the second greenhouse experiment, one of the 60 experimental soils (Trial Site 17 in Fig1),  
123 that showed low response to inoculation in the 1<sup>st</sup> greenhouse experiment based on low nodule  
124 fresh weight and shoot dry weight observed was amended either with Vermicompost (Phymyx)  
125 or urea. Vermicompost was chosen as a slow release form of N compared to urea. A slow N  
126 release would reduce the negative effect of N application to nodulation at the early growth stages  
127 of soybean. The soil was collected from an area of 4 × 3 m at a depth of 0–20 cm and  
128 homogenized after air drying and sieving. Vermicompost (Vc) was applied at 5 levels with even  
129 intervals including a control (at rates equivalent to 0, 2.5, 5, 7.5, and 10 t Vc ha<sup>-1</sup>). Equivalent  
130 amounts of N were applied using urea (46% N). The rates of N were thus 0, 37, 74, 111, and 148  
131 kg N ha<sup>-1</sup>. Selected chemical properties of the batch of the Vermicompost used in this study  
132 based on the product analysis were: total N (0.88%), organic C (7.31%), available P (0.39%), Ca  
133 (0.29%), Mg (0.1%), K (0.22%), in addition to a pH that was approximately neutral (6.7%). It  
134 was also expected to contain trace micronutrients (not determined) and is made by composting  
135 plant residue and livestock manure. The Legumefix® for soybean inoculant was used at the same  
136 rate as the 1<sup>st</sup> greenhouse experiment. The trial was laid as a CRD and each treatment replicated  
137 3 times for a total of 60 experimental pots. Planting, management, and harvesting were done as  
138 described in the 1<sup>st</sup> greenhouse experiment. The trial was thus intended to determine whether  
139 application of starter N would improve soybean response to co-application of inoculant and  
140 Sympal in a soil with both low nitrogen levels and response to inoculation, and whether there  
141 was a systematic difference between Vermicompost and urea as sources of N.

## 142 **Field trial**

143 The field trial was intended to validate the findings of the second greenhouse trials in field  
144 conditions with a focus on the best performing source of N and determine the yield performance.  
145 It was conducted at trial site 17 (Soil B) and site 7 (Soil A) (Fig 1). Site 17 was the farm at which  
146 soil was collected for the second greenhouse experiment. Soils from both sites had similar  
147 response trends in nodulation and shoot biomass as the first greenhouse experiment even though  
148 they did not have the same physical chemical characteristics (Table 1) and thus were chosen for  
149 the field trial validation. The field trial was conducted during the long rains (April to August) of  
150 the 2016 cropping season. The treatments at each site were laid out in a full factorial randomized  
151 complete block design (RCBD) where Sympal was applied at the rates used in the greenhouse  
152 trials (0 and 30 kg P ha<sup>-1</sup>). The five rates of Vermicompost used in the second greenhouse  
153 experiment were applied, i.e., equivalent to 0, 2.5, 5, 7.5, and 10 t ha<sup>-1</sup>, whereas inoculation was  
154 done using Legumefix® for Soybean at the same rate as the greenhouse trials. The maximum of  
155 10 t ha<sup>-1</sup> was based on the general recommendation for compost application in the region. The  
156 plot sizes were 3 m × 3 m with a 0.5 m alley between the plots and 1 m between the three blocks.  
157 Soybean was planted at a spacing of 50 cm (between rows) × 5 cm (within rows) at the onset of  
158 the long rainy season (April 2016). Vermicompost and Sympal were applied in furrows and  
159 mixed with soil before placement of seeds to avoid direct contact with the seed. Seed sterilization  
160 and inoculant application rates were as used in the greenhouse trials. The trials were kept weed  
161 free by mechanical weeding.

## 162 **Data collection**

163 In the greenhouse experiments the plants were harvested at 50% podding. Shoots were cut using  
164 a clean, sharp knife at 1 cm above the soil surface. The pots were emptied into a 2-mm sieve and



165 soil washed to isolate the nodules from the roots. Nodule fresh weight, shoot biomass, and  
166 nodule occupancy were captured in both greenhouse experiments, whereas in the second  
167 greenhouse experiment additional data collected were nodule effectiveness and N uptake.

168 Fresh nodules were surface sterilized and stored in glycerol for nodule occupancy determination.  
169 Nodule occupancy was then done using the Polymerase chain reaction-Restriction fragment  
170 length polymorphism (PCR-RFLP) method. This involved amplification and restriction of the  
171 16S-23S rDNA intergenic spacer region. A maximum number of eight nodules from each of the  
172 three replicates per treatment (24 nodules) were crushed separately in 150  $\mu$ l of sterile water and  
173 DNA extracted [44]. Amplification of DNA (PCR) was conducted using rhizobia specific  
174 primers [45, 46]. Due to the low number of nodules in the low rates of Vermicompost and urea  
175 treatments, only the three upper rates and their respective combinations (74, 111, and 148 kg N  
176  $\text{ha}^{-1}$ ) were considered. In addition, restriction was only conducted for PCR products of a single  
177 band of 930–1050 bp with restriction endonucleases *Moralla species* (*Msp* I). The stain with  
178 identical fragment size and number were classified into the same profile and the profiles used to  
179 score the inoculant (Legumefix® for soybean) efficacy in percentages [13].

180 Nodule effectiveness was carried out [47]. Fresh shoots were dried at 60 °C until constant weight  
181 (approximately 48 hours) to obtain the dry weight. The shoots were later milled for total N  
182 analysis by the modified Kjeldahl method. Nitrogen uptake at 50% podding was determined as  
183 the product of shoot dry biomass and the respective nitrogen content in the shoot and reported as  
184 g N  $\text{plant}^{-1}$ .

185 In the field trial, the parameters recorded at 50% podding were nodule fresh weight, nodule  
186 effectiveness, nodule occupancy, shoot dry biomass, and N uptake, while at harvest grain yield

187 was determined. Eight to ten plants were taken from one of the inner rows about 50 cm from the  
188 beginning of the line at 50% podding. Nodules were dug out and washed for nodule fresh weight  
189 determination and shoots collected for drying and weighing. A sample, i.e., 10% of the total  
190 number of nodules counted per treatment, was taken and used for determining nodule  
191 effectiveness. At physiological maturity, when 95% of the pods had turned golden yellow, all  
192 plants were harvested from the net plot excluding the outer rows. Number and weight of all  
193 plants were recorded from each plot and grains and haulms separated and weighed. The grains  
194 were later oven-dried to a constant weight.

## 195 **Data analysis**

196 In the two greenhouse trials and the field trial, the analysis of variance (ANOVA) was conducted  
197 to assess the effects of the various sources of variation, i.e., treatments using SAS version 9.4.  
198 The effects of the various factors and their interactions were assessed using standard error of  
199 difference (SED) on the mean. The significance level of the models was set at  $p < 0.05$ . In the  
200 first greenhouse experiment, box-and-whisker plots were also used to summarize the information  
201 on nodule fresh weight and shoot biomass given the large number of experimental soils (sixty  
202 data points). The assessment of nodule occupancy for the greenhouse and field trials was based  
203 on profiles with similar bp fragments in size after restriction and compared to the IGS profile of  
204 strain *B. japonicum* 532c and converted to a percentage for each IGS profile group.

## 205 **Results**

### 206 **Soil properties**

207 Selected soil properties of the experimental soils including details of trial sites 7 and 17 before  
208 the beginning of the greenhouse and field trials are presented in Table 1. A wide variation in soil  
209 properties was noted with coefficients of variance (CV) ranging from 11 to 208% with most of  
210 the parameters falling under what is considered low. There was a strong correlation between total  
211 N and C<sub>org</sub> ( $r = 0.94$ ). Rhizobia population for the selected soils ranged from 0 to  $2.83 \times 10^2$  CFU  
212 g<sup>-1</sup> of soil; hence, the response to inoculation was expected.

## 213 **Nodulation**

214 In the first greenhouse experiment, the nodule fresh weight (NFW) significantly varied across  
215 soils irrespective of inoculation, which was related to the wide variation in soil properties (Table  
216 2; Fig 2). On average inoculated (with) plants had higher NFW than uninoculated (without)  
217 plants (Fig 2). The NFW was generally low in the soils of low fertility, which calls for further  
218 investigation to reduce the spatial variability.

219 In the 2<sup>nd</sup> greenhouse experiment, co-application of starter N in the form of Vermicompost or  
220 urea (at low rates), inoculation, and Sympal significantly increased nodule fresh weight ( $p <$   
221  $0.05$ ) (Table 2). The upper rate of urea led to a decrease in NFW contrary to Vermicompost,  
222 which could be related to the difference in the availability of N from the two sources.  
223 Vermicompost co-applied with inoculation and Sympal consistently recorded a significantly  
224 higher nodule fresh weight than urea co-applied with inoculation and Sympal (Fig 3a).

225 In field conditions, NFW was improved by inoculation at Trial site 17 compared to Trial site 7  
226 (Fig 3b), which could be related to the initial fertility level of the sites (Table 1). Conversely, in  
227 the absence of inoculation, Trial site 7 performed better than Trial site 17 (Fig 3b), which could

228 be associated with the abundance of soybean nodulating rhizobia at Trial site 7 (Table 1).  
229 Regardless of the sites and inoculation, application of Sympal (Fig 3c) and Vermicompost (Fig  
230 3d) improved NFW, which implied that the nodulation of soybean by native rhizobia could be  
231 improved with good soil fertility management.

## 232 **Nodule effectiveness**

233 In the 2<sup>nd</sup> greenhouse experiment, N-amendment using Vermicompost or urea co-applied with  
234 inoculation and Sympal significantly increased the percentage of effective nodules ( $p < 0.05$ )  
235 (Table 2; Fig 4a). Vermicompost co-applied with inoculation and Sympal consistently had a  
236 higher percentage of effective nodules compared to urea, inoculation and Sympal (Fig 4a). In  
237 field conditions, inoculation at Trial Site 7 and Trial Site 17 improved nodule effectiveness at  
238 both sites, but co-application with Sympal showed better performance at Site 17 than Site 7 when  
239 compared to inoculation without Sympal (Fig 4b). Conversely, in the absence of inoculation,  
240 Sympal improved nodule effectiveness at Site 7 more than Site 17, but when Sympal was not  
241 applied, nodule effectiveness was similar at both sites (Fig 4b). While Sympal contributed to the  
242 improvement of nodule effectiveness, the magnitude of the response demonstrated that  
243 inoculation was very critical to enhance the percentage of effective nodules. This suggested the  
244 introduced strains not only increased the abundance of rhizobia cells in the rhizosphere, but were  
245 also effective in field conditions. Significant improvement of nodule effectiveness following  
246 Vermicompost application was made at a total N rate  $\geq 74 \text{ kg ha}^{-1}$  irrespective of inoculation and  
247 Sympal at both sites (Fig 4c).

## 248 **Nodule occupancy**

249 For nodule occupancy, IGS profiles as a function of total number of nodules with PCR-RFLP  
250 (930–1050 bp) bands was used. In the 1<sup>st</sup> greenhouse experiment, three IGS profile groups were  
251 obtained from PCR-RFLP analysis. The IGS profile I (91%) (inoculant strain) was dominant in  
252 the inoculated soils, while IGS profiles I and III, were in almost equal proportion in uninoculated  
253 soils (46 and 40%) respectively (Table 3). In the 2<sup>nd</sup> greenhouse experiment, nodule occupancy  
254 by the inoculant strain consistently increased with the increase in Vermicompost rates in the  
255 uninoculated treatment, showing that the strain in the rhizobia inoculant is present in the study  
256 region due to a previous history of soybean cultivation with the inoculant strain in the two sites  
257 (Table 4). An increased rate of N from Vermicompost up to 148 kg ha<sup>-1</sup> did not suppress nodule  
258 occupancy by the inoculant strain, while at a rate of 148 kg N ha<sup>-1</sup> urea nodulation was  
259 suppressed to the extent

260 that no nodules were found, with and without inoculation. This could be related to the slow  
261 release of N in Vermicompost compared to urea. For the rates of 74 and 111 kg N ha<sup>-1</sup>, under co-  
262 application of the rhizobia inoculant and Sympal, all the nodules analyzed carried the inoculant  
263 strain. Based on the results reported in Fig 3a (nodule fresh weight) and Fig 4a (nodule  
264 effectiveness) at 148 kg N ha<sup>-1</sup> from urea, it is likely that some native strains that can nodulate  
265 soybean were not detected by the specific primers used to assess the nodule occupancy and thus  
266 total number of nodules analyzed were not equal in all the treatments. This often occurs when  
267 some bacteria have acquired genes that enable nodulation but may not have all the required  
268 genes to allow detection by the set of primers; further investigation would be required.

269 In the field trial, the highest inoculant strain recovery was observed with the combination of  
270 inoculation, Vermicompost, and Sympal demonstrating the relevance of the combination to

271 supply additional nutrient, organic matter, and rhizobia particularly in the low fertility soil at Site  
272 7 (Table 4). The highest inoculant strain recovery was attained when Vermicompost was applied  
273 at 74 kg N ha<sup>-1</sup> and 111 kg N ha<sup>-1</sup> and combined with Sympal and inoculation at Site 7 (94%),  
274 while there was a slight reduction at 148 kg N ha<sup>-1</sup> for the same inputs though the inoculant strain  
275 recovery was still higher than 66% (Table 4). At Site 17, which was slightly more fertile than  
276 Site 7, the value addition of co-applying inoculation and Sympal in the presence of  
277 Vermicompost was reduced, except at 111 kg N ha<sup>-1</sup> (Table 4). In the absence of the rhizobia  
278 inoculant, co-application of Vermicompost and Sympal did enhance the nodule occupancy by  
279 native strains other than the inoculant strain, which could be less effective based on the results on  
280 nodule effectiveness (Fig 4b). In general, a consistently higher percentage of nodules occupied  
281 by the inoculant strain was observed in the inoculated and amended soils for both greenhouse  
282 and field conditions at moderate levels of N (74 and 111 kg N ha<sup>-1</sup> regardless of the source of N).  
283 This suggests that the introduced strain was more competitive in the amended soils and explains  
284 the higher percentage of effective nodules (Fig 4b). The recovery of the inoculant strain from the  
285 uninoculated treatments (especially in the 2<sup>nd</sup> greenhouse experiment) was attributed to the  
286 previous history of soybean cultivation with the same inoculant in the two farms.

## 287 **Shoot biomass**

288 On average, the inoculated treatment gave a higher shoot dry weight than the uninoculated soils  
289 in the 1<sup>st</sup> greenhouse trial, with an increase of 38% over the control (Fig 2), but the improvement  
290 of shoot biomass following inoculation significantly varied across soils (Table 2). In the 2<sup>nd</sup>  
291 greenhouse experiment, co-application of N amendments (Vermicompost or urea) with  
292 inoculation and Sympal enhanced shoot dry biomass (Fig 5a). When N was applied as

293 Vermicompost, the value addition of inoculation and Sympal was found at the low rate of N  
294 (equivalent to 37 kg N ha<sup>-1</sup>) and in the untreated control (no N). Conversely, when N was applied  
295 as urea, the value addition of inoculation and Sympal was found across the five rates of N. The  
296 difference between the two sources of N can be related to the additional nutrients in  
297 Vermicompost compared to urea that only supplied N. Across treatments, the highest shoot dry  
298 biomass at 50% podding was found at 148 N kg<sup>-1</sup> applied as urea and combined with inoculation  
299 and Sympal. This could be attributed to the fact that nitrogen from urea was readily available for  
300 uptake and resulted in vigorous vegetative growth and more biomass accumulation at the early  
301 stage of the crop with minimal N losses in greenhouse conditions.

302 In field conditions, co-application of Vermicompost and inoculation significantly improved  
303 shoot dry biomass compared to Vermicompost in the absence of inoculation, particularly when  
304 Sympal was not applied (Fig 5b). When Sympal was added to both combinations (Vermicompost  
305 with and without inoculation), the difference in shoot dry biomass was reduced, which could be  
306 related to improved utilization of N when other limiting nutrients are added. On average, the  
307 shoot dry biomass was higher at Site 17 than Site 7 irrespective of the treatments (Fig 5c), which  
308 was consistent with the initial chemical properties of the two sites (Table 1).

### 309 **Shoot biomass N uptake**

310 In the 2<sup>nd</sup> greenhouse experiment, co-application of Vermicompost or urea as a source of starter  
311 N with inoculation and Sympal significantly increased biomass N uptake when compared to the  
312 starter N sources in the absence of inoculation and Sympal (Table 2; Fig 6a). When  
313 Vermicompost or urea was not co-applied with inoculation and Sympal, increased rates of  
314 Vermicompost enhanced biomass N uptake, while increased rates of urea reduced N uptake. This

315 could be related to the improved soybean growth in the presence of Vermicompost related to the  
316 additional nutrients in the inputs, which would have improved the root system development (data  
317 not collected) and consequently N uptake. Application of inoculation and Sympal to both starter  
318 N treatments further enhanced plant development and therefore N uptake.

319 In the field conditions, co-application of Vermicompost and Sympal enhanced N uptake at Site 7  
320 (which was less fertile) more than Site 17 (Fig 6b). In the absence of Sympal, N uptake was  
321 similar at both sites when Vermicompost was applied. On average, rhizobia inoculation showed  
322 higher N uptake than uninoculated plants, irrespective of trial sites, Vermicompost, and Sympal  
323 (Fig 7c).

## 324 **Grain yield**

325 When soybean was inoculated, yields were higher at Site 17 than Site 7, while both sites had  
326 similar yields in the absence of inoculation (Fig 7a). Hence, the apparent difference in soil  
327 fertility at the two sites (Table 1) was not enough to show a difference in yields without soil  
328 amendment. Amendment with Vermicompost increased soybean grain yield from a rate of 74 kg  
329 N ha<sup>-1</sup> compared to the absolute control (Fig 7b); this rate of N was equivalent to five tons of  
330 Vermicompost ha<sup>-1</sup>. Grain yields significantly increased on amendment (475, 709, 856, 880, 966  
331 kg ha<sup>-1</sup>) after application of Vermicompost at 0, 37, 74, 111, and 148 kg N ha<sup>-1</sup>, respectively. All  
332 the measured parameters reported correlated significantly to grain yields particularly at Site 7  
333 (data not shown), which showed that amending low fertility soils using various combinations of  
334 inputs like rhizobia inoculant, Sympal, and Vermicompost could enhance soybean growth and  
335 yield assuming no other limiting factors.



## 336 **Discussion**

337 In this study, overall the effects of four key factors: site (soil), rhizobia inoculant, starter N  
338 (Vermicompost or urea), and a legume-specific fertilizer blend (Sympal) and their interactions  
339 on soybean productivity traits including nodulation, nodule effectiveness, nodule occupancy,  
340 shoot dry weight, N uptake, and yield were evaluated. These productivity traits were improved  
341 by various combinations of the three inputs, but in most cases, there was a significant site or soil  
342 effect. Previous studies demonstrated that legume response to inoculation is generally affected  
343 by (i) legume genotype, (ii) rhizobia strain, (iii) environments like soil fertility, soil amendment,  
344 and water management, and (iv) crop management such as weeding, spacing, and pest and  
345 disease control [23, 48]. In this study, the focus was on aspects related to soil fertility  
346 improvement to enhance soybean productivity traits. The hypothesis that starter N, particularly in  
347 its organic form, would improve soybean response to rhizobia inoculants and legume-specific  
348 fertilizer blends (without N) in low fertility soils was confirmed and it is crucial to understanding  
349 the underlying mechanisms.

### 350 **Need for starter N to improve soybean response to inoculation in** 351 **low fertility soils**

352 The soils used in the three experiments were low in nitrogen levels as reported [36]. Nitrogen is a  
353 major limiting factor in plant growth and development. In low fertility soils, there is a need to  
354 explore various nutrient replenishment avenues to establish best practice management options for  
355 improved soybean response to inoculation [23]. In soils with low nitrogen, a moderate amount of  
356 “starter nitrogen” would be required by the legume plants for nodule development and root and

357 shoot growth before the onset of BNF [49, 50]. In the low N soil used in the second greenhouse  
358 experiment, amendment with two nitrogen sources (Vermicompost and urea) significantly  
359 increased soybean productivity traits suggesting the nitrogen supplied played a great role in  
360 soybean growth before a symbiotic relationship of the host crop and rhizobia was fully  
361 functional. Although insignificant responses of starter N have been reported [51], positive  
362 responses have been reported by several studies which demonstrates the need of starter N,  
363 particularly in low fertility soils as it was the case in this study [52-56]. There is need to  
364 determine the threshold value of soil N content (% or g N kg<sup>-1</sup> soil) above which, starter N would  
365 not be required.

### 366 **Preference of an organic source for starter N in low fertility soils**

367 The Vermicompost treatments performed better in all the measured parameters compared to the  
368 urea treatments. Although N supplied by urea was readily available for the plant uptake, N alone  
369 could not explain the significant increase in the soybean growth traits observed. Vermicompost  
370 not only was a source of slow-release N, but also other essential nutrients such as Ca, Mg, and K,  
371 which are essential for optimal plant growth. Organic sources of N also improve soil organic  
372 carbon, which has a significant effect on soil fertility including rhizobia survival [57]. In general,  
373 soil total N and organic matter are highly correlated as found in this study. In low organic matter  
374 soils, organic amendments act as a source of nutrients, improve soil structure, and increase  
375 biodiversity and activity of the microbial population [58, 59]. Use of organic amendments to  
376 improve nutrient-depleted soils in SSA in general and western Kenyan in particular [23] would  
377 improve the physical, chemical, and biological characteristics of soil [58]. This implies that soil  
378 amendment with Vermicompost, or similar organic inputs, would be a good practice to improve

379 soybean response to inoculation as nodulation and nodule effectiveness were not suppressed up  
380 to a rate of 148 kg Vermicompost-N ha<sup>-1</sup>. Furthermore, use of organic amendments including  
381 organic fertilizers in integrated soil fertility management to supply both nutrients and organic  
382 matter would be more conducive to sustainability and resilience of the cropping systems than  
383 sole application of inorganic fertilizers.

### 384 **Balanced fertilization to improve soybean response to inoculation**

385 Significant variation of soybean response to rhizobial inoculation was observed across the sixty  
386 soils in greenhouse conditions, which was validated in field conditions at two sites. Success of  
387 soybean rhizobia inoculation is dependent on soil fertility and site location [59]. Based on  
388 recommendations [60] and the soil analysis results, the study soils from sixty locations in  
389 western Kenya had very low to moderate fertility, which agreed with earlier report [23]. This  
390 wide variation in soil properties with most of the parameters falling under low to very low [61,  
391 62] could explain the variation of the soybean response to inoculation. Similar findings of spatial  
392 variation of soybean response to biological inoculants across locations was previously reported  
393 [36]. Edaphic factors such as nutrient P and N availability and soil pH determines the  
394 effectiveness of inoculant used [36]. This has also been confirmed in our ongoing investigation  
395 on the effect of soil acidity and liming on soybean productivity traits under inoculation  
396 (unpublished). Soil amendment to improve the fertility including balanced fertilization is  
397 therefore crucial to reduce the spatial variability of soybean response to inoculation, assuming no  
398 other limiting factors.

399 In field conditions, nodule fresh weight and effectiveness were improved by the application of  
400 Sympal and/or Vermicompost. Shoot dry weight was enhanced by co-application of  
401 Vermicompost, Sympal, and inoculation, while a combination of Vermicompost and Sympal  
402 increased biomass N uptake and Vermicompost boosted grain yield. This was in line with  
403 previous findings [ 6, 63-66]. Soil amendment improved the effectiveness of the nodules and the  
404 competitiveness of the introduced strain to occupy a significant number of nodules, as shown by  
405 the nodule occupancy. Vermicompost and Sympal contained various nutrients including macro-,  
406 secondary, and micronutrients, which are essential to plant growth and effective nodulation. A  
407 package of fertilization interventions based on proper soil fertility diagnosis in legume cropping  
408 systems including organic inputs, a legume-specific fertilizer blend conducive to nodule  
409 formation, and efficacious rhizobia inoculants would be more effective than a sole application of  
410 one component of the package [65, 67-70]; though profitability analysis would be required to  
411 inform the choice of package to recommend. Hence, current development initiatives that promote  
412 rhizobia inoculation without necessary soil fertility diagnosis or only focus on co-application of  
413 phosphorus and rhizobia inoculants must be revisited to consider balanced fertilization. Effective  
414 legume rhizobia inoculation only adds N in the cropping systems so there is a need to ensure that  
415 the other nutrients are available at appropriate levels for optimum plant growth. Availability of  
416 essential nutrients and moderate levels of nitrogen generally enhance nodule formation and  
417 functioning [71, 73]. High rates of nitrogen fertilizers however have been shown to inhibit  
418 nodule formation in both controlled and field conditions [24, 34, 74, 75]. Hence, investigations  
419 to determine the threshold values, depending, among others, on soil types, below which starter N  
420 would be required to improve legume response to inoculation in low fertility soils, are needed.

## 421 **Effectiveness of inoculant rhizobial strains**

422 Response to rhizobia inoculation is expected in soils of low native rhizobia or where the  
423 compatible rhizobia of the host legume are absent [76, 77]. The rhizobia populations in the sixty  
424 soils were below  $1.0 \times 10^3$  CFU g<sup>-1</sup> of soil, which has been reported as the minimal population of  
425 native rhizobia for a response to inoculation to be achieved for legume crops like soybean [78].  
426 The capacity of an inoculant strain to occupy nodules on the host depends on environment  
427 factors such as the presence of indigenous rhizobia and soil type [79, 80]. The increased nodule  
428 weight and shoot biomass over the control due to rhizobia inoculation indicated that the  
429 introduced strain was more effective than the indigenous bradyrhizobia. This was in line with  
430 previous studies [13, 56, 81-83] which reported significant increases in nodulation and biomass  
431 with rhizobia inoculation. The soybean increased biomass, nodulation, and effective nodules due  
432 to inoculation confirms the need to inoculate soybean seeds in the soils of the selected sites.  
433 Even though the variety TGx1740-2F is promiscuous, nodule occupancy analysis confirmed  
434 successful inoculation. Inoculation with Legumefix® for soybean significantly increased the  
435 percentage of effective nodules and nodule occupancy both in greenhouse and field experiments.  
436 Nodule effectiveness and occupancy are important indicators of efficient soybean rhizobia  
437 symbiosis [47, 80]. The yield increase following inoculation at both sites was in line with other  
438 reported findings [14, 65, 81, 87]. As mentioned above, to optimize soybean response to rhizobia  
439 inoculants, soil amendment with organic sources of nutrients and legume-specific fertilizer  
440 blends in low fertile soils will be of great importance not only in Siaya County of Kenya, but  
441 also across SSA where nutrient depletion is widely spread [4, 86] in addition to address issues  
442 related to factors like legume genotype, efficacy of rhizobia strains, as well as good crop and  
443 water management.

## 444 **Conclusion**

445 Soil amendment with Vermicompost, inoculation, and Sympal in low fertility soils increased  
446 soybean productivity traits including yields. Soybean response to inoculation was affected by  
447 soil properties. Vermicompost supplied both nutrients and organic carbon, while Sympal  
448 contributed additional nutrients, which improved the nutrient status of the low fertility soils and  
449 consequently soybean response to inoculation. Development initiatives focusing on legume  
450 inoculation or co-application of rhizobia inoculants and phosphorus fertilizers only, without  
451 proper soil fertility diagnosis, must be revised to optimize the benefits expected from inoculation  
452 including BNF. Starter N in the form of Vermicompost in low fertility soils at the rates used in  
453 this study did not suppress soybean nodulation, and it improved the productivity traits of the  
454 crop. However, further investigation is required to determine the threshold value of soil N  
455 content above which there will be no need to recommend starter N when rhizobia inoculants are  
456 applied to legume crops. This was beyond the scope of this study as many factors will have to be  
457 considered including soil types, mineralogy, weather conditions, legume genotype, rhizobia  
458 strains, and crop management.

## 459 **Acknowledgement**

460 We are grateful for the financial support by the International Institute of Tropical Agriculture  
461 (IITA) under the COMPRO-II project funded by the Bill & Melinda Gates Foundation  
462 (OPPGD1398). We also acknowledge the contributions of Harrison Mburu, Elias Mwangi,  
463 Martin Kimanthi, and Philip Malala for their technical assistance during laboratory and  
464 greenhouse work.

## 465 **References**

- 466 1. Smith KJ, Huysen W. World distribution and significance of soybean. In: Soybeans:  
467 improvement, production, and uses; Second Edition. (Ed). J. R. Wilcox. 1987; pp. 1-22.  
468 American Society of Agronomy. Madison, Wisconsin.
- 469 2. Li-Juan Q, Ru-Zhen C. The origin and history of soybean. In: Singh, B. (ed.), The Soybean:  
470 Botany, Production and Uses. CAB International, 2010. Oxford shire, UK. pp. 1–23
- 471 3. Singh G, Shivakumar BG. The role of soybean in agriculture Division of Agronomy, Indian  
472 Agricultural Research Institute, 2010; New Delhi, India.
- 473 4. Liu J, You L, Amini M, Obersteiner M, Herrero M, Zehnder A J, Yang H. A high-resolution  
474 assessment on global nitrogen flows in cropland. Proceedings of the National Academy of  
475 Sciences. 2010; 107(17), 8035-8040.
- 476 5. Bain LE, Awah PK, Geraldine N, Kindong NP, Siga Y, Bernard N, Tanjeko AT. Malnutrition  
477 in Sub-Saharan Africa: Burden, causes and prospects. Pan Afr Med J. 2013; 15(1). doi:  
478 [10.11604/pamj.2013.15.120.2535](https://doi.org/10.11604/pamj.2013.15.120.2535)
- 479 6. Mpeperekhi S, Javaheri F, Davis P, Giller KE. Soybeans and sustainable agriculture:  
480 promiscuous soybeans in southern Africa. Field Crop Res. 2000; 65(2): 137-149.  
481 doi:10.1016/S0378-4290(99)00083-0
- 482 7. Vanlauwe B, Bationo A, Chianu J, Giller KE, Merckx R, Mokwunye U, Smaling EMA.  
483 Integrated soil fertility management operational definition and consequences for  
484 implementation and dissemination. Outlook Agric. 2010; 39(1): 17-24.

- 485 8. Yakubu H, Kwari JD, Ngala AL. N<sub>2</sub> fixation by grain legume varieties as affected by Rhizobia  
486 inoculation in the sandy loam soil of Sudano-Sahelian zone of North Eastern Nigeria. Niger J  
487 Basic Appl Sci. 2010; 18 (2).
- 488 9. Kueneman EA, Root WR, Dashiell KE, Hohenberg J. Breeding soybeans for the tropics  
489 capable of nodulating effectively with indigenous *Rhizobium spp.* Plant Soil. 1984; 82(3):  
490 387-396. doi:10.1007/BF02184276
- 491 10. Musiyiwa K, Mpeperek S, Giller KE. Symbiotic effectiveness and host ranges of indigenous  
492 rhizobia nodulating promiscuous soybean varieties in Zimbabwean soils. Soil Biol. Biochem.  
493 2005; 37(6): 1169-1176.
- 494 12. Bekere W, Hailemariam A. Influences of inoculation methods and phosphorus levels on  
495 nitrogen fixation attributes and yield of soybean (*Glycine max L.*). At Haru, Western  
496 Ethiopia. Am J Plant Nutr. Fertil. Technol. 2012; 2(2): 45-55.
- 497 13. Thuita M, Pypers P, Herrmann L, Okalebo RJ, Othieno C, Muema E, Lesueur D.  
498 Commercial rhizobial inoculants significantly enhance growth and nitrogen fixation of a  
499 promiscuous soybean variety in Kenyan soils. Biol. Fertil. Soils 2012; 48(1): 87-96. doi:  
500 10.1007/s00374-011-0611-z
- 501 14. Ronner E, Franke A. C, Vanlauwe B, Dianda M, Edeh E, Ukem B, Giller KE. Understanding  
502 variability in soybean yield and response to P-fertilizer and rhizobium inoculants on farmers'  
503 fields in northern Nigeria. Field Crop Res. 2016; 186: 133-145.  
504 doi.org/10.1016/j.fcr.2015.10.023



- 505 15. Hungria M, Campo RJ, Mendes IC, Graham, PH. Contribution of biological nitrogen fixation  
506 to the N nutrition of grain crops in the tropics: The success of soybean (*Glycine max* L.  
507 Merr.) in South America. In: Singh RP, Shankar N, Jaiwal PK, (Eds) Nitrogen nutrition and  
508 sustainable plant productivity. 2006; Stadium press, LLC, Houston TX, pp. 43-93.
- 509 16. Salvagiotti F, Cassman KG, Specht JE, Walters DT, Weiss A, Dobermann A. Nitrogen  
510 uptake, fixation and response to fertilizer N in soybeans: A review. Field Crop Res. 2008;  
511 108(1): 1-13. Doi.org/10.1016/j.fcr.2008.03.001
- 512 17. Giller KE. Nitrogen fixation in tropical cropping systems, 2001; 2<sup>nd</sup> edn. Wallingford, CAB
- 513 18. Unkovich MJ, Pate JS. An appraisal of recent field measurements of symbiotic N<sub>2</sub> fixation by  
514 annual legumes. Field Crop Res. 2000; 65(2): 211-228. doi: 10.1016/S0378-4290(99)00088-  
515 X.
- 516 19. Herridge DF, Peoples MB, Boddey RM. Global inputs of biological nitrogen fixation in  
517 agricultural systems. Plant Soil 2008; 311: 1-18. doi:10.1007/s11104-008-9668-3.
- 518 20. Mapfumo P. Comparative analysis of the current and potential role of legumes in integrated  
519 soil fertility management in southern Africa. In Fighting Poverty in Sub-Saharan Africa: The  
520 Multiple Roles of Legumes in Integrated Soil Fertility Management 2010. Springer  
521 Netherlands. pp. 175-200
- 522 21. Sanchez PA, Shepherd KD, Soule MJ, Place FM, Buresh RJ, Izac AMN, Woomer PL. Soil  
523 fertility replenishment in Africa: an investment in natural resource capital. Replenishing soil  
524 fertility in Africa 1997; p 1-46.

- 525 22. Gibson AH, Dreyfus BL, Dommergues YR. Nitrogen fixation by legumes in the tropics. In:  
526 Microbiology of Tropical Soils and Plant Productivity 1982; pp. 37-73. Springer  
527 Netherlands.
- 528 23. Woomer PL, Huising J, Giller KE, Baijukya FP, Kantengwa S, Vanlauwe B, Sanginga J.  
529 N2Africa: Final Report of the first Phase-2009-2013 (No. 73)2014; N2Africa.
- 530 24. Keino L, Baijukya F, Ng'etich W, Otinga AN, Okalebo JR, Njoroge R, Mukalama J.  
531 Nutrients Limiting Soybean (*Glycine max l*) Growth in Acrisols and Ferralsols of Western  
532 Kenya. PloS One; 2015; 10(12): e0145202. doi.org/10.1371/journal.pone.0145202
- 533 25. Thuita M, Vanlauwe B, Mutegi E, Masso C. Reducing spatial variability of soybean response  
534 to rhizobia inoculants in farms of variable soil fertility in Siaya County of western Kenya.  
535 Agriculture ecosystem and Environment. 2018; 261:153–160. doi:  
536 10.1016/j.agee.2018.01.007
- 537 26. Gruhn P, Goletti F, Yudelman M. Integrated nutrient management, soil fertility, and  
538 sustainable agriculture: current issues and future challenges. International Food Policy  
539 Research Institute, 2000.
- 540 27. Singh B, Ryan J. Managing fertilizers to enhance soil health. International Fertilizer Industry  
541 Association (IFA) 2015; Paris, France.
- 542 28. Nandwa SM. Soil organic carbon (SOC) management for sustainable productivity of  
543 cropping and agro-forestry systems in Eastern and Southern Africa. In: Managing organic  
544 matter in tropical soils: Scope and limitations 2001; (pp. 143-158). Springer Netherlands.

- 545 29. Bationo A, Kihara J, Vanlauwe B, Waswa B, Kimetu J. Soil organic carbon dynamics,  
546 functions and management in West African agro-ecosystems. *Agric Syst.* 2007; 94(1): 13-25.
- 547 30. Streeter J, Wong PP. Inhibition of legume nodule formation and N<sub>2</sub> fixation by nitrate. *Crit.*  
548 *Rev. Plant Sci.* 1988; 7(1): 1-23. doi.org/10.1080/07352688809382257
- 549 31. Svenning MM, Junttila O, Macduff JH. Differential rates of inhibition of N<sub>2</sub> fixation by  
550 sustained low concentrations of NH<sub>4</sub><sup>+</sup> and NO<sub>3</sub><sup>-</sup> in northern ecotypes of white clover  
551 (*Trifolium repens* L.). *J Exp. Bot.* 1996; 47(6): 729-738.
- 552 32. Zahran HH. *Rhizobium*-legume symbiosis and nitrogen fixation under severe conditions and  
553 in an arid climate. *Microbiol. Mol. Biol. Rev.* 1999; 63(4): 968-989.
- 554 33. Becker M, Alazard D, Ottow JCG. Mineral nitrogen effect on nodulation and nitrogen  
555 fixation of the stem-nodulating legume *Aeschynomene afraspera*. *J Plant Nutr Soil Sci.* 1986;  
556 149(4): 485-491.
- 557 34. Ohyama T, Fujikake H, Yashima H, Sueyoshi K, Ohtake N, Ishii S, Nishiwaki T. Effect of  
558 nitrate on nodulation and nitrogen fixation of soybean. 2011; Intech Open Access Publisher.
- 559 35. Rashidi M, Seilsepour M. Modelling of soil total nitrogen based on soil organic carbon.  
560 *ARPN (Asian Research Publishing Network) J Agric. Biol. Sci.* 2009; 4(2): 1-5.
- 561 36. Masso C, Ochieng, JRA, Vanlauwe B. Worldwide contrast in application of bio-fertilizers for  
562 sustainable agriculture: lessons for sub-Saharan Africa. *J Biol Agric Health.* 2015; 5(2): 34-  
563 50.

- 564 37. Heanes DL. Determination of total organic-C in soils by an improved chromic acid digestion  
565 and spectrophotometric procedure. *Commun Soil Sci Plant*. 1984; 15(10): 1191-1213. doi:  
566 10.1080/00103628409367551
- 567 38. Buondonno A, Rashad AA, Coppola E. Comparing tests for soil fertility II. The hydrogen  
568 peroxide/sulfuric acid treatment as an alternative to the copper/selenium catalyzed digestion  
569 process for routine determination of soil nitrogen Kjeldahl. *Commun Soil Sci Plant*. 1995;  
570 26(9-10): 1607-1619. doi: 10.1080/07352689709701948.
- 571 39. Anderson JM, Ingram JSI. *Tropical Soil Biology and Fertility: A handbook of methods*.  
572 Second edition. CAB International, The Cambrian News, Aberystwyth, United Kingdom,  
573 1993; p-221.
- 574 41. Murphy J, Riley J. A modified single solution method for the determination of phosphate in  
575 natural waters. *Anal Chim Acta*. 1962; 27: 31-36. doi: 10.1016/S0003-2670(00)88444-5
- 576 42. Brockwell J, Diatloff A, Grassia A, Robinson AC. Use of wild soybean (*Glycine ussuriensis*  
577 Regel and Maack) as a test plant in dilution—nodulation frequency tests for counting  
578 *Rhizobium japonicum*. *Soil Biol Biochem*. 1975; 7(4-5): 305-311.
- 579 40. Mehlich A. Mehlich 3 soil test extractant: A modification of Mehlich 2 extractant. *Commun*  
580 *Soil Sci Plant* 1984; 15(12): 1409-1416. doi: 10.1080/00103628409367568
- 581 43. Wasike VW, Lesueur D, Wachira FN, Mungai NW, Mumera LM, Sanginga N, Vanlauwe B.  
582 Genetic diversity of indigenous *Bradyrhizobium* nodulating promiscuous soybean [*Glycine*  
583 *max* (L) Merr.] varieties in Kenya: impact of phosphorus and lime fertilization in two  
584 contrasting sites. *Plant Soil*. 2009; 322(1-2): 151-163. doi: 10.1007/s11104-009-9902-7

- 585 44. Krasova-Wade T, Ndoye I, Braconnier S, Sarr B, de Lajudie P, Neyra M. Diversity of  
586 indigenous bradyrhizobia associated with three cowpea cultivars (*Vigna unguiculata* (L.)  
587 Walp.) grown under limited and favorable water conditions in Senegal (West Africa). Afr. J.  
588 Biotechnol. 2003; 2(1): 13-22. doi: 10.5897/AJB2003.000-1003
- 589 45. Navarro E, Simonet P, Normand P, Bardin R. Characterization of natural populations of  
590 *Nitrobacter* spp. using PCR/RFLP analysis of the ribosomal intergenic spacer. Arch.  
591 Microbiol. 1992; 157(2): 107-115. doi:10.1007/BF00245277
- 592 46. Ponsonnet C, Nesme X. Identification of *Agrobacterium* strains by PCR-RFLP analysis of  
593 pTi and chromosomal regions. Arch. Microbiol. 1994; 161(4): 300-309.  
594 Doi.org/10.1007/BF00303584
- 595 47. Adjei MB, Quesenberry KH, Chambliss CG. Nitrogen fixation and inoculation of forage  
596 legumes. SS-AGR-56, Agronomy Department, Florida Cooperative Extension Service,  
597 Institute of Food and Agricultural Science, University of Florida. 2002.
- 598 48. Giller KE, Franke AC, Abaidoo R, Baijukya F, Bala A, Boahen S, Dashiell K, Kantengwa S,  
599 Sanginga J, Sanginga N, Simmons A, Turner A, Wolf JD, Woomer PL, Vanlauwe B.  
600 N2Africa: putting nitrogen fixation to work for smallholder farmers in Africa. In: Vanlauwe  
601 B, Van Asten P, Blomme G (Eds.), *Agro-ecological Intensification of Agricultural Systems*  
602 *in the African Highlands 2013*; Routledge, London, pp. 156–174.
- 603 49. Herridge DF, Roughley RJ, Brockwell J. Effect of rhizobia and soil nitrate on the  
604 establishment and functioning of the soybean symbiosis in the field. *Crop Pasture Sci.* 1984;  
605 35(2): 149-161. doi.org/10.1071/AR9840149

- 606 50. Goi SR, Sprent JI, James EK, Jacob-Neto J. Influence of nitrogen form and concentration on  
607 the nitrogen fixation of *Acacia auriculiformis*. *Symbiosis*, 1993; 14(1-3): 115-122.
- 608 51. Mendes IC, Hungria M, Vargas, MAT. Soybean response to starter nitrogen and  
609 *Bradyrhizobium* inoculation on a cerrado oxisol under no-tillage and conventional tillage  
610 systems. *Braz J Soil Sci.* 2003; 27(1): 81-87. doi.org/10.1590/S0100-06832003000100009
- 611 52. Lamb JA, Rehm GW, Severson RK, Cymbaluk TE. Impact of inoculation and use of  
612 fertilizer nitrogen on soybean production where growing seasons are short. *J Prod. Agric.*  
613 1990; 3(2): 241-245. doi.org/10.1016/0038-0717(95)98641-Z.
- 614 53. Starling ME, Wood C, Weaver DB. Starter nitrogen and growth habit effects on late-planted  
615 soybean. *Agron J.* 1998; 90(5): 658-662.
- 616 54. Osborne SL, Riedell WE. Soybean growth response to low rates of nitrogen applied at  
617 planting in the northern Great Plains. *J Plant Nutr.* 2006; 29(6): 985-1002.  
618 doi.org/10.1080/01904160600686007
- 619 55. Sohrabi Y, Habibi A, Mohammadi K, Sohrabi M, Heidari G, Khalesro S, Khalvandi M.  
620 Effect of nitrogen (N) fertilizer and foliar-applied iron (Fe) fertilizer at various reproductive  
621 stages on yield, yield component and chemical composition of soybean (*Glycine max* L.  
622 Merr.) seed. *Afr J Biotechnol.* 2012; 11(40): 9599-9605. Doi.org/ 10.5897/AJB11.3568
- 623 56. Janagard MS, and Ebadi-Segherloo A. Inoculated soybean response to starter nitrogen in  
624 conventional cropping system in Moghan. *J Agron.* 2016; 15(1): 26. doi:  
625 10.3923/ja.2016.26.32

- 626 57. Swanepoel PA, Botha PR, Truter WF, Surridge-Talbot, AK. The effect of soil carbon on  
627 symbiotic nitrogen fixation and symbiotic *Rhizobium* populations in soil with *Trifolium*  
628 *repens* as host plant. Afr J Range Forage Sci. 2011; 28(3): 121-127.  
629 Doi.org/10.2989/10220119.2011.642096
- 630 58. Albiach R, Canet R, Pomares F, Ingelmo F. Microbial biomass content and enzymatic  
631 activities after the application of organic amendments to a horticultural soil. Bioresour  
632 Technol. 2000; 75(1): 43-48. doi: 10.1016/S0960-8524(00)00030-4.
- 633 59. Date RA. Inoculated legumes in cropping systems of the Tropics. Field Crop Res. 2000; 65:  
634 123–136. doi: 10.1016/S0378-4290(99)00082-9.
- 635 59. Liu J, Xie Q, Shi Q, Li M. Rice uptake and recovery of nitrogen with different methods of  
636 applying <sup>15</sup>N-labeled chicken manure and ammonium sulfate. Plant Prod. Sci. 2008; 11(3):  
637 271-277. doi:10.1626/ppp.11.271
- 638 60. Tadesse T. Soil, plant, water, fertilizer, animal manure and compost analysis. Working  
639 Document No. 13. International Livestock Research Center for Africa, 1991; Addis Ababa,  
640 Ethiopia.
- 641 61. FAO. Plant nutrition for food security: A guide for integrated nutrient management. FAO,  
642 2006; Fertilizer and Plant Nutrition Bulletin 16. Food and Agriculture Organization (FAO),  
643 Rome.
- 644 62. Okalebo JR, Gathua KW, Woomer PL. Laboratory methods of soil and plant analysis: a  
645 working manual Nairobi, Kenya: Tropical Soil Biology and Fertility Programme. 2002 (p.  
646 88).

- 647 63. Adeli A, Sistani KR, Rowe DE, Tewolde H. Effects of broiler litter on soybean production  
648 and soil nitrogen and phosphorus concentrations. *Agron J.* 2005; 97(1): 314-321.
- 649 64. Mishra A, Prasad K, Rai G. Effect of bio-fertilizer inoculations on growth and yield of dwarf  
650 field pea (*Pisum sativum* L.) in conjunction with different doses of chemical fertilizers. *J.*  
651 *Agron.* 2010; 9(4): 163-168. doi: 10.3923/ja.2010.163.168
- 652 65. Tahir MM, Abbasi MK, Rahim N, Khaliq A, Kazmi MH. Effect of *Rhizobium* inoculation  
653 and NP fertilization on growth, yield, and nodulation of soybean (*Glycine max* L.) in the sub-  
654 humid hilly region of Rawalakot Azad Jammu and Kashmir, Pakistan. *Afr J Biotechnol.*  
655 2009; 8(22): 6191. Doi.org/10.5897/AJB09.1039 AFR J
- 656 66. Devi KN, Singh TB, Athokpam HS, Singh NB, Samurailatpam D. Influence of inorganic,  
657 biological and organic manures on nodulation and yield of soybean (*Glycine max* Merrill L.)  
658 and soil properties. *Aust J Crop Sci.* 2013; 7(9): 1407.
- 659 67. O'Hara G, Yates R, Howieson J. Selection of strains of root nodule bacteria to improve  
660 inoculant performance and increase legume productivity in stressful environments.  
661 Inoculants and nitrogen fixation of legumes in Vietnam. 2002; ACIAR Proceedings.
- 662 68. Zhang H, Daoust F, Charles TC, Driscoll BT, Prithiviraj B, Smith DL. *Bradyrhizobium*  
663 *japonicum* mutants allowing improved nodulation and nitrogen fixation of field-grown  
664 soybean in a short season area. *J Agric Sci.* 2002; 138(03): 293-300. doi:  
665 10.1017/S0021859602001995



- 666 69. Rathke GW, Christen O, Diepenbrock W. Effects of nitrogen source and rate on productivity  
667 and quality of winter oilseed rape (*Brassica napus* L.) grown in different crop rotations. Field  
668 Crop Res 2005; 94(2): 103-113.
- 669 70. Sarr A, Neyra M, Houeibib MAO, Ndoeye I, Oihabi A, Lesueur D. Rhizobial populations in  
670 soils from natural Acacia Senegal and Acacia nilotica forests in Mauritania and the Senegal  
671 River valley. Microbial Ecol. 2005; 50(2): 152-162. Doi.org/10.1007/s00248-004-0077-8
- 672 71. Schulze J. Nitrogen fixation by white lupin under phosphorus deficiency. Ann. Bot. 2006;  
673 98: 731–740. doi.org/10.1093/aob/mcl154
- 674 72. Divito GA, Sadras VO. How does phosphorus, potassium, and sulphur affect plant growth  
675 and biological nitrogen fixation in crop and pasture legumes? A meta-analysis. Field Crop  
676 Res 2014; 156: 161-71. doi: 10.1016/j.fcr.2013.11.004.
- 677 73. Yoseph T, Worku W. Effect of NP fertilizer rate and *Bradyrhizobium* inoculation on  
678 nodulation, N-Uptake and crude protein content of Soybean [*Glycine Max* (L.) Merrill], at  
679 Jinka, Southern Ethiopia. J Biol, Agric Healthc. 2014; 4(6): 49-54.
- 680 74. Otieno PE, Muthomi JW, Chemining'wa GN, Nderitu JH. Effect of rhizobia inoculation,  
681 farmyard manure and nitrogen fertilizer on growth, nodulation and yield of selected food  
682 grain legumes. In 8<sup>th</sup> African Crop Science Society Conference, El-Minia, Egypt, 27-31  
683 October 2007 African Crop Science Society. 2007; pp. 305-312.
- 684 75. Bekere W, Kebede T, Dawud, J. Growth and nodulation response of soybean (*Glycine max*  
685 L.) to lime, *Bradyrhizobium japonicum* and nitrogen fertilizer in acid soil at Melko, South  
686 western Ethiopia. Int J Soil Sci. 2013; 8(1): 25. doi: 10.3923/ijss.2013.25.31

- 687 76. Abaidoo RC, Keyser HH, Singleton PW, Dashiell KE, Sanginga N. Population size,  
688 distribution, and symbiotic characteristics of indigenous *Bradyrhizobium spp.* that nodulate  
689 TGx soybean genotypes in Africa. *Appl Soil Ecol.* 2007; 35(1): 57-67.  
690 doi:10.1016/j.apsoil.2006.05.006
- 691 77. Fening JO, Danso SKA. Variation in symbiotic effectiveness of cowpea bradyrhizobia  
692 indigenous to Ghanaian soils. *Appl. Soil Ecol.* 2002; 21(1): 23-29.
- 693 78. Thies JE, Singleton PW, Bohlool BB. Influence of the size of indigenous rhizobial  
694 populations on the establishment and symbiotic performance of introduced rhizobia on field-  
695 grown legumes. *Appl Environ Microbiol.* 1991a; 57: 19-28.
- 696 79. Thies JE, Bohlool BB, Singleton PW. Environmental effects on competition for nodule  
697 occupancy between introduced and indigenous rhizobia and among introduced strains. *Can J*  
698 *Microbiol.* 1992; 38(6): 493-500. doi.org/ 10.1139/m92-081
- 699 80. Vlassak KM, Vanderleyden J, Graham PH. Factors influencing nodule occupancy by  
700 inoculant rhizobia. *Crit Rev Plant Sci.* 1997; 16(2): 163-229. doi:  
701 10.1080/07352689709701948
- 702 81. Rahmani AH, Saleh-Rastin N. A study of the effect of soil available N and indigenous  
703 rhizobial population on the growth and yield of soybean and modeling of the inoculation  
704 prediction. In: W.J. Horst et al. eds. *Plant nutrition-food security and sustainability of agro-*  
705 *ecosystems.* 2001; Wiley, New York. 680-681

- 706 82. Bai Y, Pan B, Charles TC, Smith DL. Co-inoculation dose and root zone temperature for  
707 plant growth promoting rhizobacteria on soybean [*Glycine max* (L.) Merr] grown in soil-less  
708 media. *Soil Biol. Biochem.* 2002; 34(12): 1953-1957. doi: 10.1016/S0038-0717(02)00173-6.
- 709 82. Hussain K, Islam M, Siddique MT, Hayat R, Mohsan S. Soybean growth and nitrogen  
710 fixation as affected by Sulfur fertilization and inoculation under rainfed conditions in  
711 Pakistan. 2011; *Int J Agric Biol* 13(6).
- 712 83. Hungria M, Mendes IC. Nitrogen fixation with soybean: the perfect symbiosis? Biological  
713 nitrogen fixation, In: De Bruijn F (Ed.) *Biological nitrogen fixation*. 2015; Chapter 99. New  
714 Jersey: John Wiley & Sons, Inc., vol.2. p. 1005-1019. Doi: 10.1002/9781119053095.ch99
- 715 84. Masso C, Mukhongo, RW, Thuita M, Abaidoo R, Ulzen J, Kariuki G, Kalumuna M.  
716 Biological inoculants for sustainable intensification of agriculture in Sub-Saharan Africa  
717 smallholder farming systems. In: *Climate change and multi-dimensional sustainability in*  
718 *African agriculture*. 2016; (pp. 639-658). Springer International Publishing.
- 719 85. Müller O, Krawinkel M. Malnutrition and health in developing countries. *Can Med Assoc. J.*  
720 2005; 173(3): 279-286.
- 721 86. Vanlauwe B, Descheemaeker KKE, Giller KE, Huising J, Merckx R, Nziguheba G, Zingore  
722 S. Integrated soil fertility management in sub-Saharan Africa: unravelling local adaptation.  
723 *Soil*. 2015; 1: 1239-1286.
- 724 87. Egamberdiyeva D, Qarshieva D, Davranov K. Growth and yield of soybean varieties  
725 inoculated with *Bradyrhizobium spp* in N-deficient calcareous soils. *Biol. Fertil. Soils*. 2004;  
726 40(2): 144-146. doi: 10.1007/s00374-004-0755-1.

1 **Table 1. Selected chemical, microbiological, and physical properties of the sixty experimental**  
 2 **soils with details of Trial site 7 (Soil A) and Trial site 17 (Soil B).**

| <b><sup>a</sup>Overall</b> |                                    |             |                |                |           |            |                           |                           |
|----------------------------|------------------------------------|-------------|----------------|----------------|-----------|------------|---------------------------|---------------------------|
| <b>Parameter</b>           | <b>Units</b>                       | <b>Mean</b> | <b>Minimum</b> | <b>Maximum</b> | <b>SD</b> | <b>CV%</b> | <b><sup>b</sup>Soil A</b> | <b><sup>c</sup>Soil B</b> |
| Available P                | mg kg <sup>-1</sup>                | 15.49       | 1.02           | 156.57         | 31.9      | 205.9      | 3.06                      | 11.98                     |
| pH(H <sub>2</sub> O)       | -                                  | 5.76        | 4.25           | 7.03           | 0.66      | 11.46      | 4.52                      | 5.43                      |
| Total N                    | g kg <sup>-1</sup>                 | 1.1         | 0.21           | 2.1            | 0.4       | 36.36      | 0.6                       | 0.8                       |
| Organic C                  | g kg <sup>-1</sup>                 | 1.39        | 3.3            | 21             | 4.3       | 30.94      | 8                         | 10.5                      |
| Ca                         | cmol <sub>c</sub> kg <sup>-1</sup> | 5.48        | 0.42           | 18.32          | 3.88      | 70.8       | 0.85                      | 5.49                      |
| Mg                         | cmol <sub>c</sub> kg <sup>-1</sup> | 2.33        | 0.23           | 8.56           | 1.74      | 74.68      | 0.33                      | 1.51                      |
| K                          | cmol <sub>c</sub> kg <sup>-1</sup> | 0.71        | 0.07           | 3.6            | 0.69      | 97.18      | 0.21                      | 0.26                      |
| MPN                        | CFU g <sup>-1</sup>                | 41          | 0              | 283            | 87.6      | 208.6      | 65                        | 23                        |
| Textural class             | -                                  | -           | -              | -              | -         | -          | Clay                      | Clay                      |

bioRxiv preprint doi: <https://doi.org/10.1101/476291>; this version posted November 21, 2018. The copyright holder for this preprint (which was not certified by peer review) is the author/funder, who has granted bioRxiv a license to display the preprint in perpetuity. It is made available under aCC-BY 4.0 International license.

3 P, phosphorus; K, potassium; Ca, calcium; Mg, magnesium; N, nitrogen; MPN, most probable  
 4 number; CFU, colony forming units; SD, standard deviation of the means and CV, coefficient of  
 5 variance

6 <sup>a</sup>Overall stands for mean value across the 60 experimental soils

7 <sup>b</sup>Soil A stands for the mean value for the soil collected from the Trial Site 7

8 <sup>c</sup>Soil B stands for the mean value for the soil collected from the Trial Site 17

## Figure Caption

**Fig 1:** Sites where the soils used in the first greenhouse experiment were collected including Trial Site 17 (i.e. Soil B) that was also used in both the second greenhouse experiment and the field trial, and Trial Site 7 (i.e. Soil A) used also in the field trial

**Fig 2:** Soybean nodule fresh weight and shoot dry weight in the first greenhouse experiment with and without co-application of Legumefix and Sympal (L+S) across sixty soils.

bioRxiv preprint doi: <https://doi.org/10.1101/476291>; this version posted November 21, 2018. The copyright holder for this preprint (which was not certified by peer review) is the author/funder, who has granted bioRxiv a license to display the preprint in perpetuity. It is made available under aCC-BY 4.0 International license.

**Fig3:** Soybean nodule fresh weight across trials following: (a) N-amendment in the form of vermicompost or urea co-applied with Legumefix and Sympal (L+S) in the second greenhouse trial (Soil B from Trial Site 17); (b) Legumefix application at Trial Site 7 and Trial Site 17 (field conditions); (c) Sympal application in field conditions; and (d) vermicompost in field conditions. The error bars represent the standard error of the difference (SED).

**Fig 4:** Soybean nodule effectiveness across trials following: (a) N-amendment in the form of vermicompost or urea co-applied with Legumefix and Sympal (L+S) in the second greenhouse trial (Soil B from Trial Site 17); (b) Legumefix and Sympal applications in field conditions at Trial Site 7 and Trial Site 17; and (c) vermicompost application in field conditions irrespective of the sites. The error bars represent the standard error of the difference (SED).

**Fig 5:** Shoot dry weight across trials following: (a) N-amendment in the form of vermicompost or urea co-applied with Legumefix and Sympal (L+S) in the second greenhouse trial (Soil B from Trial Site 17); (b) various combinations of vermicompost, Legumefix, and Sympal in field conditions; and (c) locations. The error bars represent the standard error of the difference (SED).
